# Supplementary material for: Preparation and photoluminescent properties of magnetic Ni@SiO2–CDs fluorescent nanocomposites
Source: Royal Society of Chemistry journal article supplement (doi:10.1039/c3ra45310c), 2013-11-25
Supplement: c3ra45310c.pdf [file c3ra45310c.pdf]

## Supporting Information

Preparation and photoluminescent properties of magnetic  
Ni@SiO<sub>2</sub>-CDs fluorescent nanocomposites

**Dan Wang, Yali Guo, Weisheng Liu, Wenwu Qin<sup>1</sup>**

[Nov 8, 2013]

*Key Laboratory of Nonferrous Metal Chemistry and Resources Utilization of Gansu  
Province and State Key Laboratory of Applied Organic Chemistry, College of  
Chemistry and Chemical Engineering, Lanzhou University, Lanzhou 730000, P. R.  
China.*

---

<sup>1</sup> To whom correspondence should be addressed. E-mail for W. Qin: qinww@lzu.edu.cn, Tel.: +86-931-8912582; Fax: +86-931-8912582

Table S1 Photophysical Properties of CDs and Ni@SiO<sub>2</sub>-CDs. Decay times  $\tau_1$ ,  $\tau_2$  and  $\tau_3$ , and the relative amplitude (%).

| Compound                 | Phase State | Excitation Wavelength /nm | Monitored Emission Wavelength /nm | $\tau_1$ /ns | $\tau_2$ /ns | $\tau_3$ /ns  |
|--------------------------|-------------|---------------------------|-----------------------------------|--------------|--------------|---------------|
| CDs                      | ethanol     | 330                       | 420                               | 1.21(5.31%)  | 5.27(34.33%) | 12.33(60.36%) |
|                          |             |                           | 440                               | 1.16(2.31%)  | 5.18(25.59%) | 13.08(72.09%) |
|                          |             |                           | 460                               | 1.76(2.47%)  | 6.32(23.45%) | 14.14(74.08%) |
|                          |             | 360                       | 420                               | 1.09(15.41%) | 4.49(41.81%) | 11.92(42.78%) |
|                          |             |                           | 440                               | 1.25(9.82%)  | 5.23(31.00%) | 13.80(59.18%) |
|                          |             |                           | 460                               | 1.36(9.89%)  | 5.69(27.20%) | 14.18(62.92%) |
| Ni@SiO <sub>2</sub> -CDs | ethanol     | 330                       | 420                               | 1.07(16.65%) | 5.03(53.30%) | 11.27(30.05%) |
|                          |             |                           | 440                               | 1.04(16.32%) | 4.88(43.54%) | 10.66(40.14%) |
|                          |             |                           | 460                               | 1.06(17.78)  | 5.57(50.41%) | 12.21(31.81%) |
|                          |             | 360                       | 420                               | 1.00(17.47%) | 4.78(42.73%) | 10.26(39.80%) |
|                          |             |                           | 440                               | 0.96(17.35%) | 4.97(40.53%) | 10.84(42.12%) |
|                          |             |                           | 460                               | 0.97(18.91%) | 5.31(41.08%) | 11.42(40.01%) |
|                          | Solid       | 330                       | 420                               | 2.94(25.45%) | 8.77(74.55%) | —             |
|                          |             |                           | 440                               | 2.81(28.57%) | 8.38(71.43%) | —             |
|                          |             |                           | 460                               | 3.14(24.97%) | 9.10(75.03%) | —             |
|                          |             | 360                       | 420                               | 2.96(27.21%) | 8.84(72.79%) | —             |
|                          |             |                           | 440                               | 3.17(25.70%) | 9.17(74.30%) | —             |
|                          |             |                           | 460                               | 3.23(24.72%) | 9.49(75.28%) | —             |

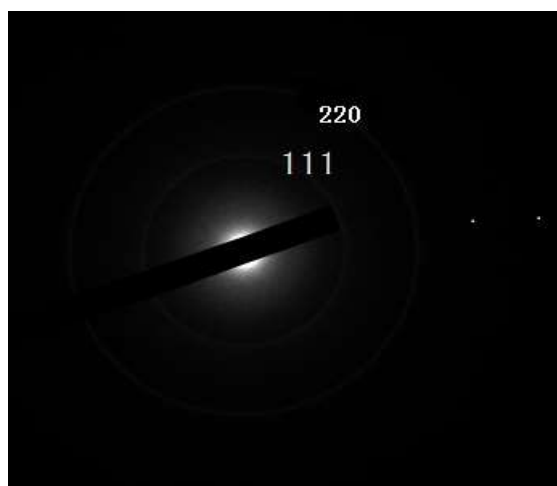

**Figure S1.** A selected area electron diffraction (SAED) pattern of nickel nanoparticles

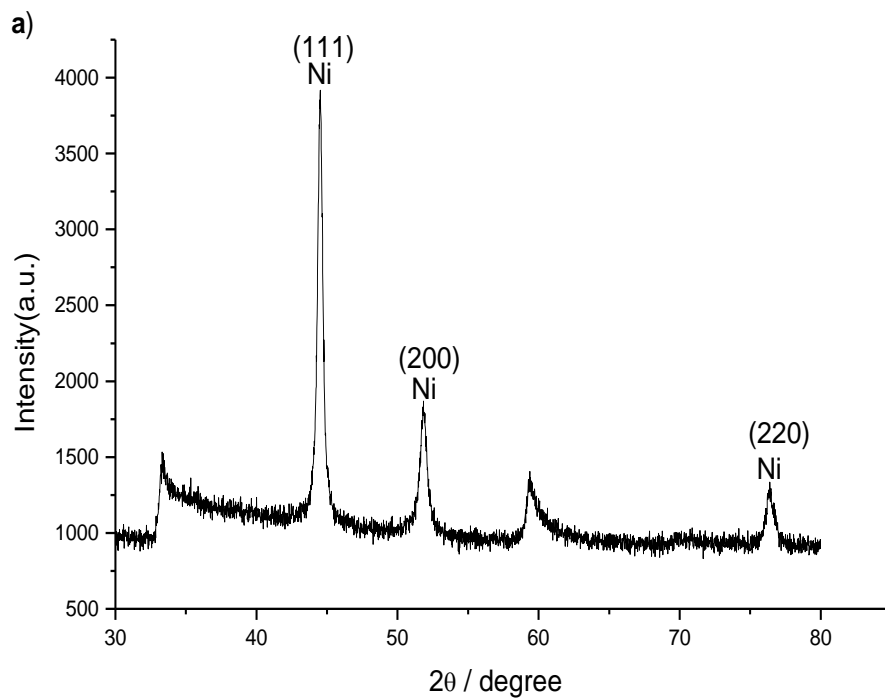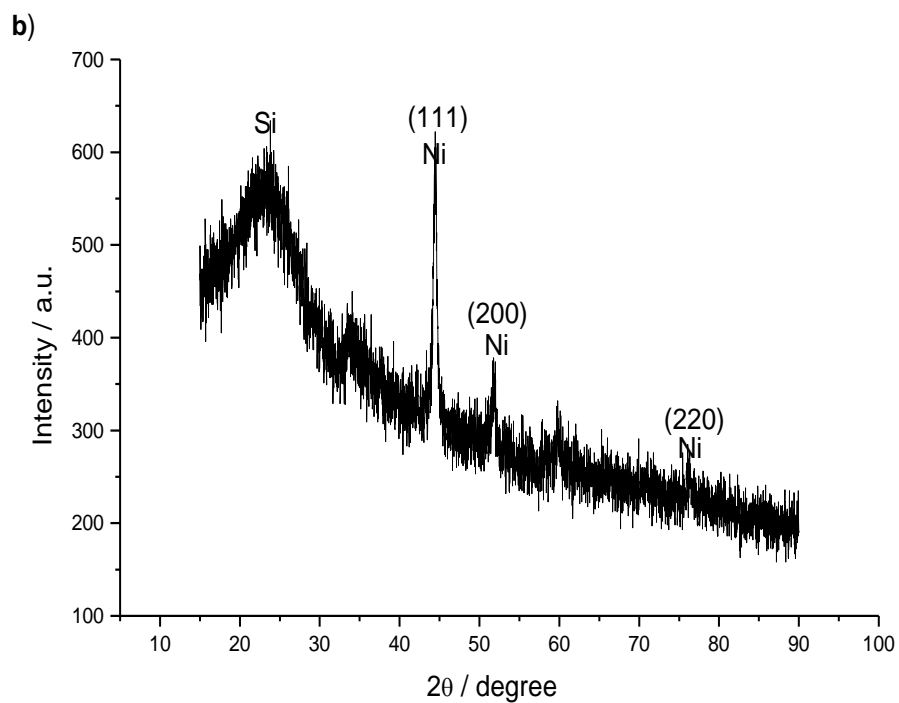

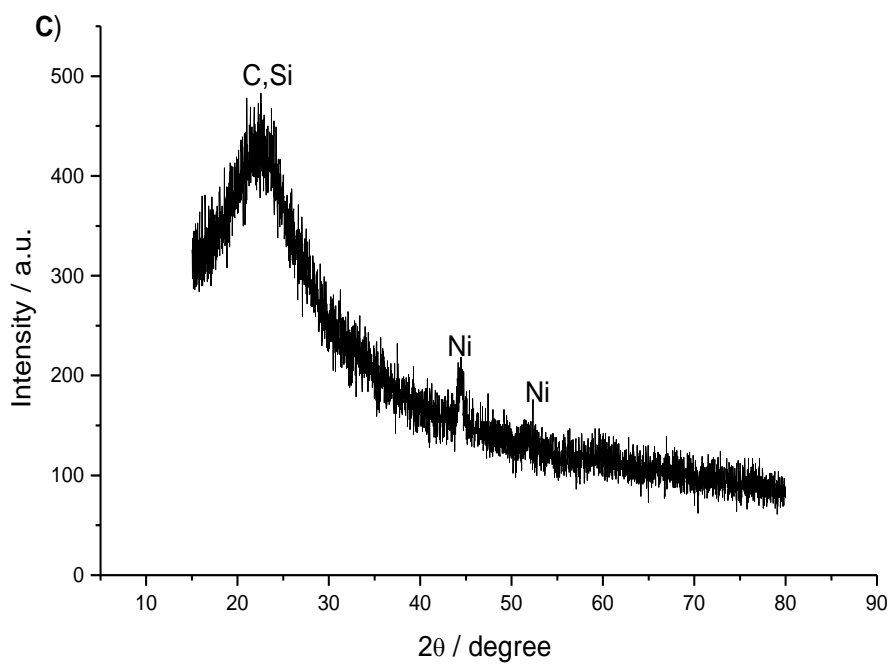

**Figure S2.** XRD spectra of (a) Ni, (b) Ni@SiO<sub>2</sub> and (c) Ni@SiO<sub>2</sub>-CDs.

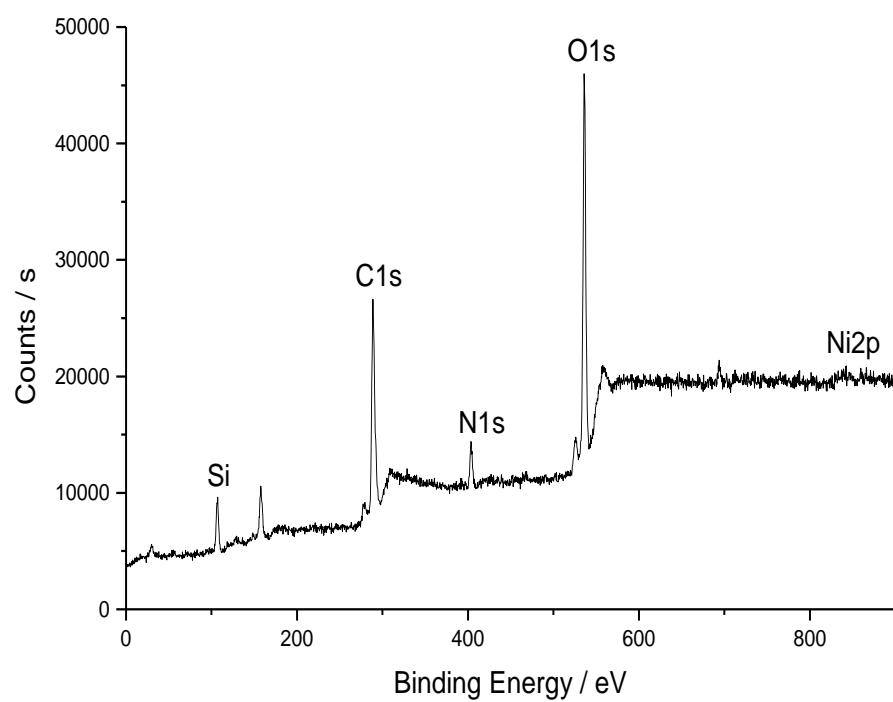

**Figure S3.** XPS survey of the Ni@SiO<sub>2</sub>-CDs.

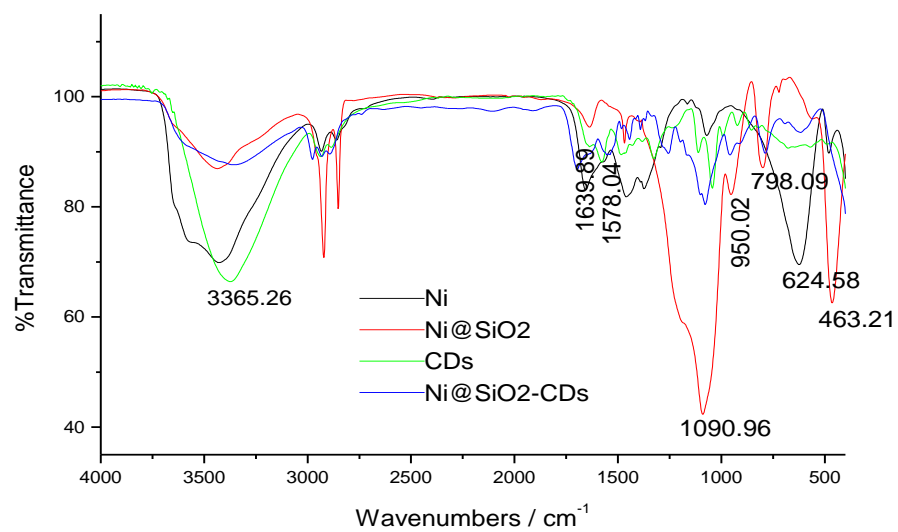

**Figure S4.** IR spectrum of Ni, Ni@SiO<sub>2</sub>, CDs, Ni@SiO<sub>2</sub>-CDs.

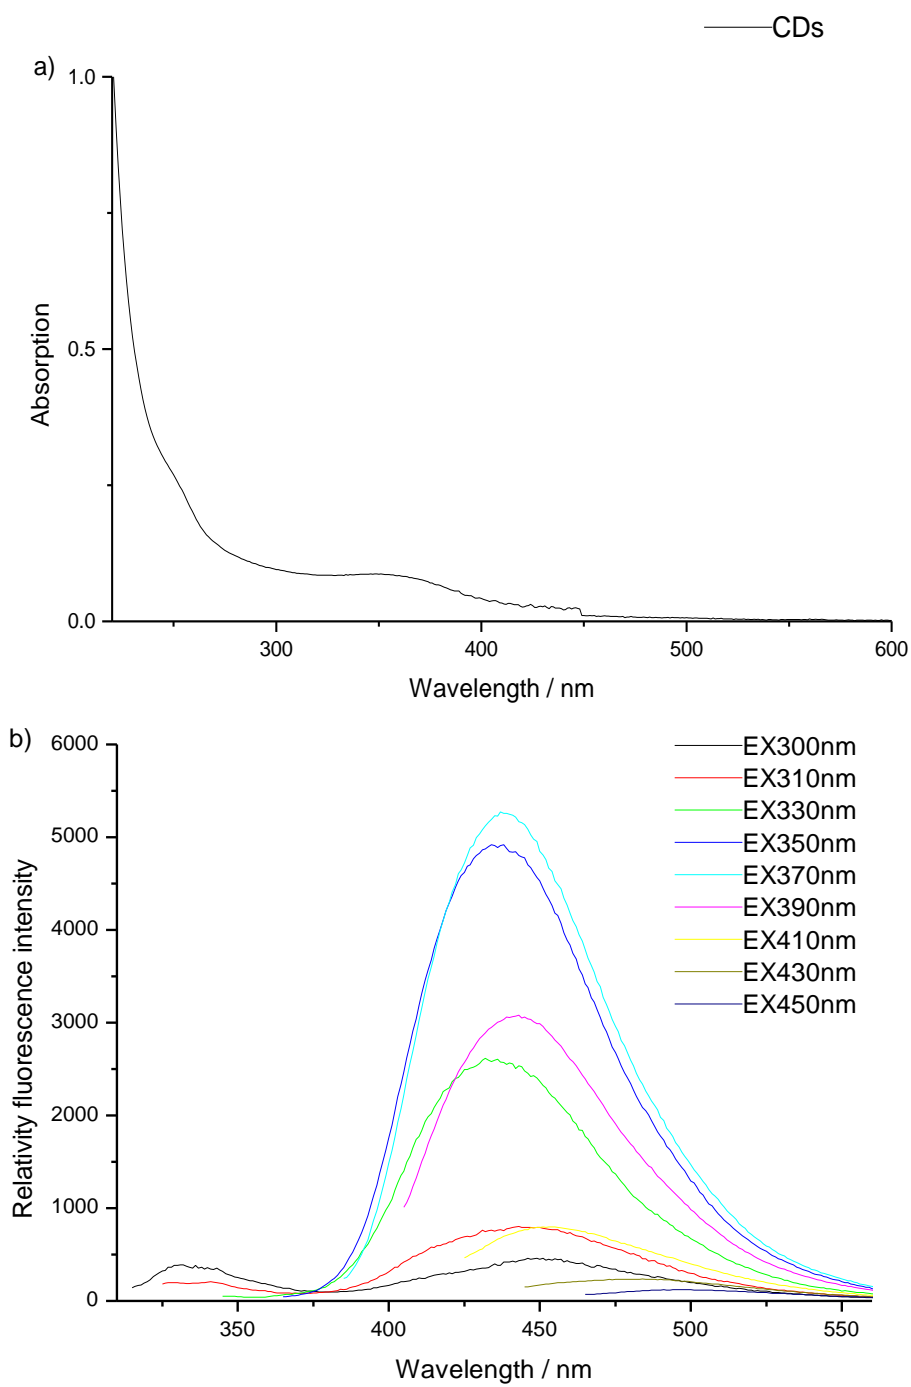

**Figure S5.** (a) Absorption spectra of CD in ethanol. (b) Corresponding fluorescence emission spectra of CD in ethanol with different excitation wavelengths.



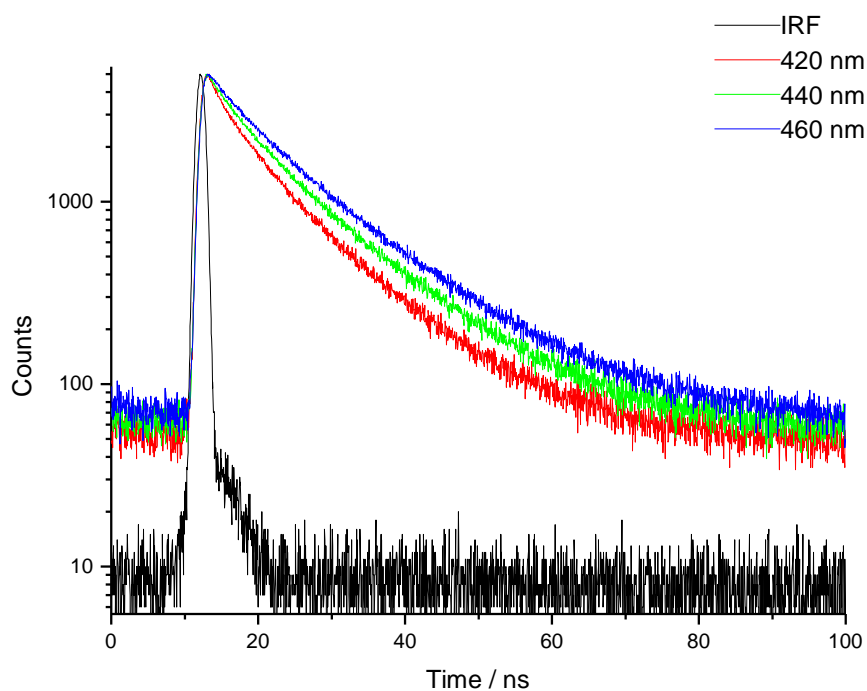

**Figure S6.** The decay curves of CDs in ethanol collected at different wavelengths when excited at 330 nm.

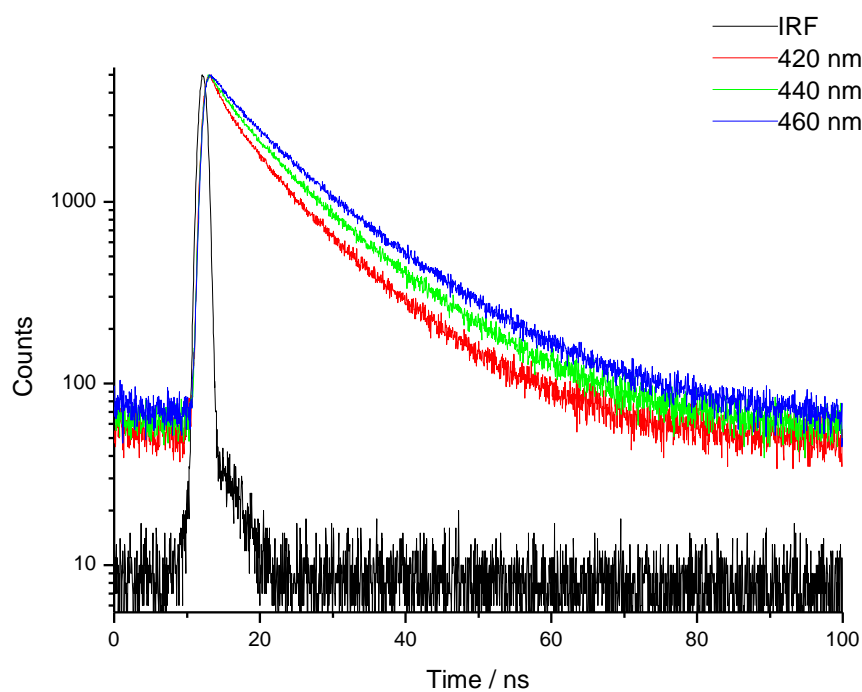

**Figure S7.** The decay curves of CDs in ethanol collected at different wavelengths when excited at 360 nm.

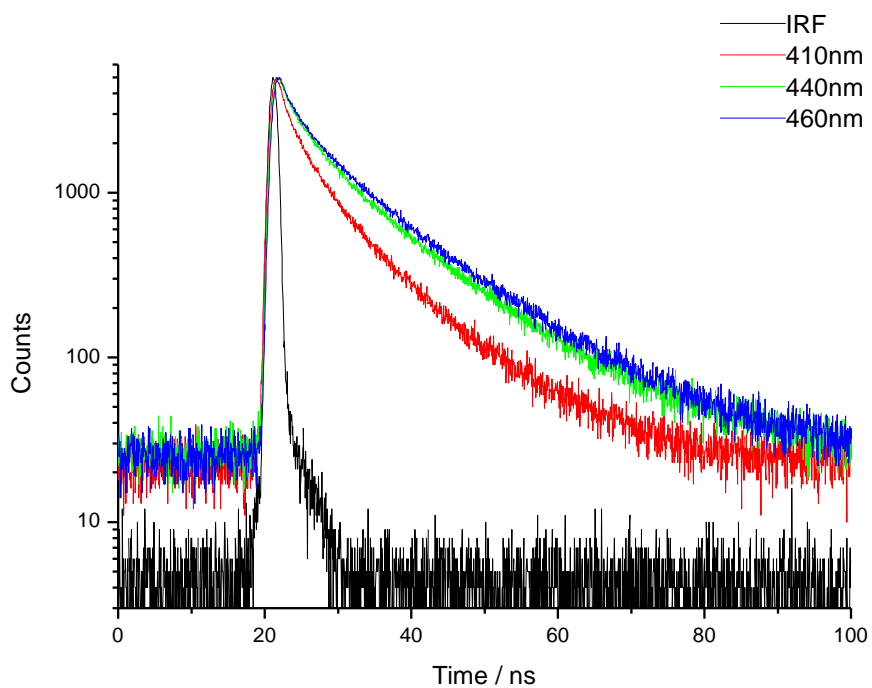

**Figure S8.** The decay curves of Ni@SiO<sub>2</sub>-CDs in solid state collected at different wavelengths when excited at 330 nm.

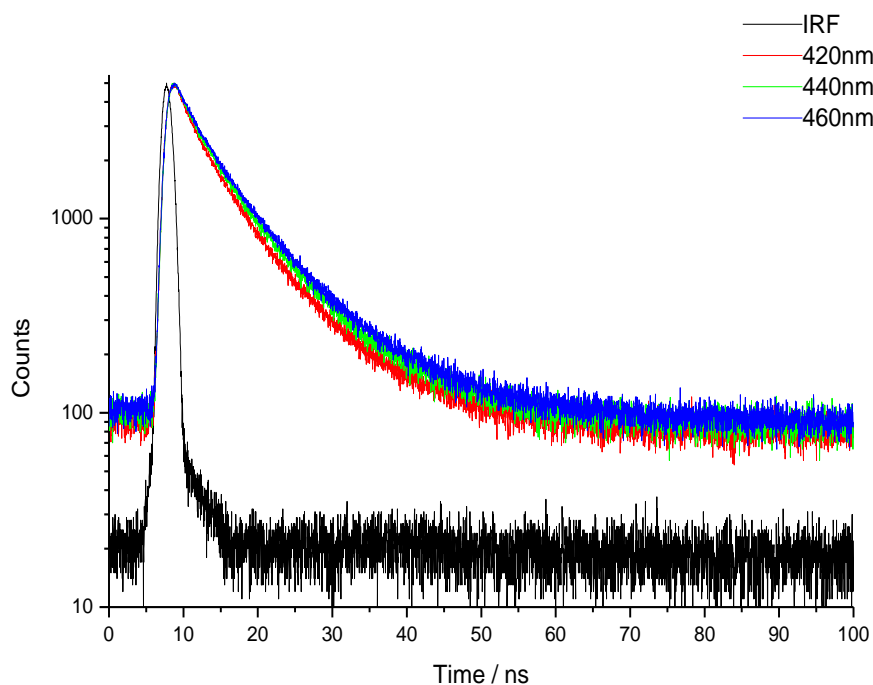

**Figure S9.** The decay curves of Ni@SiO<sub>2</sub>-CDs in ethanol solution collected at different wavelengths when excited at 330 nm.

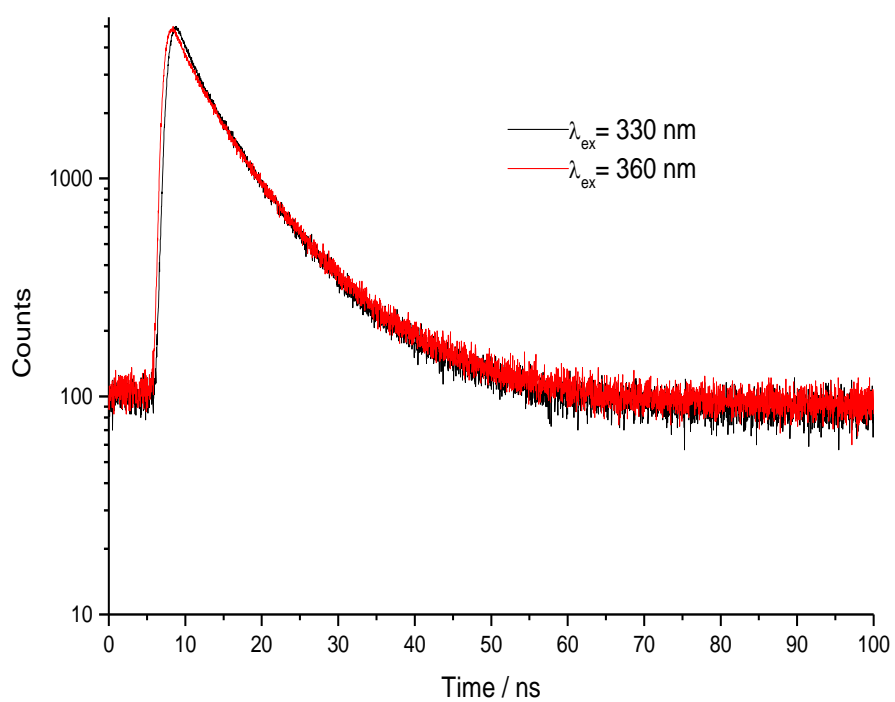

**Figure S10.** The decay curves of Ni@SiO<sub>2</sub>-CDs in solid state collected at 440 nm when excited at 330 nm and 360 nm.
